# Supplementary material
Source: publisher figshare collection journal article supplement (https://scielo.figshare.com/articles/dataset/_/6124775)
Supplement: Supplementary file 1 [file Table_1.xls]

## Sheet: Table_1
<b>HÃ¡bitos de vida</b>	<b>EutrÃ³ficos n = 151</b>		<b>Sobrepeso/Obeso n = 96</b>		<b>Geral n = 247 (%)</b>
	Meninos n = 63 (%)	Meninas n = 88 (%)	Meninos n = 52 (%)	Meninas n = 44 (%)
Atividades em casa
Assiste TV	61 (97)	81 (92)	50 (96)	40 (90)	234 (95)
Joga videogame	50 (79)	21 (24)	31 (60)	8 (18)	110 (45)
LÃª	43 (68)	57 (65)	35 (67)	35 (80)	170 (69)
Escuta mÃºsica	36 (57)	54 (61)	28 (54)	35 (80)	153 (62)
Brinca com amigos	47 (75)	65 (74)	32 (62)	30 (68)	174 (70)
Brinca sozinho	38 (60)	59 (67)	33 (63)	31 (70)	161 (65)
Tarefas domÃ©sticas	55 (87)	74 (84)	44 (85)	39 (89)	212 (86)
Ajuda na profissÃ£o dos pais	28 (44)	24 (27)	17 (33)	13 (30)	82 (33)
Cuida de crianÃ§a menor	28 (44)	35 (40)	17 (33)	22 (50)	102 (41)
Estuda	50 (79)	77 (87)	49 (94)	41 (93)	216 (87)
Atividades fora de casa
Cinema	34 (54)	42 (48)	25 (48)	25 (57)	126 (51)
Passeia a pÃ©	44 (70)	55 (62)	32 (62)	30 (68)	161 (65)
Atividades fora de casa
Passeia de carro	51 (81)	66 (75)	40 (77)	38 (86)	195 (79)
Vai Ã praÃ§a/parque	41 (65)	45 (51)	36 (70)	26 (59)	148 (60)
Anda de bicicleta	49 (78)	56 (64)	37 (71)	30 (68)	172 (69)
Anda de skate	34 (54)	15 (17)	25 (48)	7 (16)	81 (33)
Anda de patins	14 (22)	35 (39)	7 (13)	17 (39)	73 (30)
Vai ao shopping	52 (83)	65 (74)	39 (75)	42 (95)	198 (80)
Materiais esportivos que possui
Bicicleta	53 (84)	71 (81)	44 (85)	36 (82)	205 (83)
Patins	13 (21)	41 (46)	10 (19)	18 (41)	82 (33)
Skate	41 (65)	19 (21)	28 (54)	8 (18)	95 (38)
Bola de plÃ¡stico	25 (40)	45 (51)	18 (35)	23 (52)	112 (45)
Bola de futebol	47 (75)	24 (27)	34 (65)	22 (50)	126 (51)
Bola de vÃ´lei	17 (27)	27 (31)	10 (19)	12 (27)	66 (27)
Bola de basquete	20 (32)	13 (15)	17 (33)	11 (25)	61 (25)
Chuteira	52 (83)	5 (6)	37 (71)	-	94 (38)
Lugar onde brinca
Quintal de casa	38 (60)	50 (57)	29 (56)	30 (68)	148 (60)
PÃ¡tio do condomÃ­nio	8 (13)	14 (16)	5 (10)	6 (14)	32 (13)
Terreno baldio	12 (19)	3 (3)	8 (15)	3 (7)	26 (11)
Rua	29 (46)	32 (36)	30 (58)	18 (41)	109 (44)
PraÃ§a/parque	20 (32)	29 (33)	16 (31)	14 (32)	79 (32)
PrÃ¡tica de esporte
Sim	31 (49)	26 (30)	26 (50)	15 (34)	98 (40)
NÃ£o	32 (51)	62 (70)	26 (50)	29 (66%)	149 (60)
