# Supplementary material
Source: publisher figshare collection journal article supplement (https://scielo.figshare.com/articles/dataset/_/6124775)
Supplement: Supplementary file 2 [file Table_2.xls]

## Sheet: Table_2
<b>Grupos</b>	<b>Desempenho TC6â (% do predito) mÃ©dia (DP)</b>		<b><i>p</i></b>
	Deslocamento ativo	Deslocamento passivo
Geral	101.5 Â± 0.7585 n = 105	101.0 Â± 0.7616 n = 142	0.6213
EutrÃ³fico	102.2 Â± 1.056 n = 58	99.22 Â± 0.9493 n = 93	0.0410<sup>*</sup>
Sobrepeso/Obeso	100.7 Â± 1.081 n = 47	104.3 Â± 1.141 n = 49	0.0215<sup>*</sup>
