# Supplementary material
Source: publisher figshare collection journal article supplement (https://scielo.figshare.com/articles/dataset/_/6124775)
Supplement: Supplementary file 3 [file Table_3.xls]

## Sheet: Table_3
<b>Grupos</b>	<b>NÃ£o sabe</b>	<b>Desempenho TC6â (% do predito) mÃ©dia (DP)</b>		<b><i>P</i></b>
		Dorme menos de 10h/noite	Dorme mais de 10h/noite
Geral	9	101.9 Â± 0.6106 n = 161	100.2 Â± 1.108 n = 77	0.1374
EutrÃ³fico	8	101.2 Â± 0.7933 n = 93	99.06 Â± 1.494 n = 50	0.1738
Sobrepeso/Obeso	1	102.7 Â± 0.9773 n = 68	102.3 Â± 1.479 n = 27	0.8082
