# Supplementary material
Source: publisher figshare collection journal article supplement (https://scielo.figshare.com/articles/dataset/_/6124775)
Supplement: Supplementary file 4 [file Table_4.xls]

## Sheet: Table_4
<b>Grupos</b>	<b>Desempenho TC6â (% do predito) MÃ©dia (DP)</b>		<b><i>p</i></b>
	Pratica esporte	NÃ£o pratica esporte
Geral	103.0 Â± 0.8741 n = 98	100.0 Â± 0.6773 n = 149	0.0065<sup>*</sup>
EutrÃ³fico	102.9 Â± 1.171 n = 57	98.83 Â± 0.8789 n = 94	0.0053<sup>*</sup>
Sobrepeso/Obeso	103.2 Â± 1.327 n = 41	102.1 Â± 1.005 n = 55	0.5060
