# Supplementary material
Source: publisher figshare collection journal article supplement (https://scielo.figshare.com/articles/dataset/_/6124775)
Supplement: Supplementary file 5 [file Table_5.xls]

## Sheet: Table_5
<b>Life habits</b>	<b>Eutrophic n = 151</b>		<b>Overweight/Obese n = 96</b>		<b>General n = 247 (%)</b>
	Boys n = 63 (%)	Girls n = 88 (%)	Boys n = 52 (%)	Girls n = 44 (%)
Activities at home
Watches TV	61 (97)	81 (92)	50 (96)	40 (90)	234 (95)
Plays video games	50 (79)	21 (24)	31 (60)	8 (18)	110 (45)
Reads	43 (68)	57 (65)	35 (67)	35 (80)	170 (69)
Listens to music	36 (57)	54 (61)	28 (54)	35 (80)	153 (62)
Plays with friends	47 (75)	65 (74)	32 (62)	30 (68)	174 (70)
Plays alone	38 (60)	59 (67)	33 (63)	31 (70)	161 (65)
Household chores	55 (87)	74 (84)	44 (85)	39 (89)	212 (86)
Helps in the parentsâ profession	28 (44)	24 (27)	17 (33)	13 (30)	82 (33)
Takes care of younger child	28 (44)	35 (40)	17 (33)	22 (50)	102 (41)
Studies	50 (79)	77 (87)	49 (94)	41 (93)	216 (87)
Outdoor activities
Cinema	34 (54)	42 (48)	25 (48)	25 (57)	126 (51)
Walks	44 (70)	55 (62)	32 (62)	30 (68)	161 (65)
Goes on car rides	51 (81)	66 (75)	40 (77)	38 (86)	195 (79)
Strolls in the square/park	41 (65)	45 (51)	36 (70)	26 (59)	148 (60)
Rides a bicycle	49 (78)	56 (64)	37 (71)	30 (68)	172 (69)
Skateboards	34 (54)	15 (17)	25 (48)	7 (16)	81 (33)
Skates	14 (22)	35 (39)	7 (13)	17 (39)	73 (30)
Goes to the mall	52 (83)	65 (74)	39 (75)	42 (95)	198 (80)
Sporting goods they have
Bicycle	53 (84)	71 (81)	44 (85)	36 (82)	205 (83)
Inline skates	13 (21)	41 (46)	10 (19)	18 (41)	82 (33)
Skateboard	41 (65)	19 (21)	28 (54)	8 (18)	95 (38)
Plastic ball	25 (40)	45 (51)	18 (35)	23 (52)	112 (45)
Soccer ball	47 (75)	24 (27)	34 (65)	22 (50)	126 (51)
Volleyball	17 (27)	27 (31)	10 (19)	12 (27)	66 (27)
Basketball	20 (32)	13 (15)	17 (33)	11 (25)	61 (25)
Football boots	52 (83)	5 (6)	37 (71)	-	94 (38)
Play area
Backyard	38 (60)	50 (57)	29 (56)	30 (68)	148 (60)
Condo patio	8 (13)	14 (16)	5 (10)	6 (14)	32 (13)
Vacant lot	12 (19)	3 (3)	8 (15)	3 (7)	26 (11)
Street	29 (46)	32 (36)	30 (58)	18 (41)	109 (44)
Square/park	20 (32)	29 (33)	16 (31)	14 (32)	79 (32)
Sport practice
Yes	31 (49)	26 (30)	26 (50)	15 (34)	98 (40)
No	32 (51)	62 (70)	26 (50)	29 (66%)	149 (60)
