# Supplementary material
Source: publisher figshare collection journal article supplement (https://scielo.figshare.com/articles/dataset/_/6124775)
Supplement: Supplementary file 7 [file Table_7.xls]

## Sheet: Table_7
<b>Groups</b>	<b>Does not know</b>	<b>Performance on the 6MWT (% of the predicted) mean (SD)</b>		<b><i>P</i></b>
		Sleeps less than 10 h/night	Sleeps more than 10 h/night
General	9	101.9 Â± 0.6106 n = 161	100.2 Â± 1.108 n = 77	0.1374
Eutrophic	8	101.2 Â± 0.7933 n = 93	99.06 Â± 1.494 n = 50	0.1738
Overweight/Obese	1	102.7 Â± 0.9773 n = 68	102.3 Â± 1.479 n = 27	0.8082
