# Supplementary material
Source: publisher figshare collection journal article supplement (https://scielo.figshare.com/articles/dataset/_/6124775)
Supplement: Supplementary file 8 [file Table_8.xls]

## Sheet: Table_8
<b>Groups</b>	<b>Performance on the 6MWT (% of predicted) Mean (SD)</b>		<b><i>p</i></b>
	Plays sports	Does not play sports
General	103.0 Â± 0.8741 n = 98	100.0 Â± 0.6773 n = 149	0.0065<sup>*</sup>
Eutrophic	102.9 Â± 1.171 n = 57	98.83 Â± 0.8789 n = 94	0.0053<sup>*</sup>
Overweight/Obese	103.2 Â± 1.327 n = 41	102.1 Â± 1.005 n = 55	0.5060
